# Supplementary material
Source: MDPI journal article supplement (https://www.mdpi.com/2073-4441/10/6/717)
Supplement: s1 [file s1]

**Suppl. Table S1.** Meteorological conditions during the different studied phases, obtained from the nearest meteorological station (Chulilla), and plant status.

|                | Temperature (°C) |         |       |         |       |         | Precipitation (mm) |       | ET <sub>0</sub> (mm) |             |                   | Plant            | status    |
|----------------|------------------|---------|-------|---------|-------|---------|--------------------|-------|----------------------|-------------|-------------------|------------------|-----------|
|                | Tavg             |         | Tmax  |         | Tmin  |         | accumulated        | max   | accumulated          | accumulated | <i>H.</i>         |                  | <i>T.</i> |
|                | mean             | std dev | mean  | std dev | mean  | std dev |                    |       |                      |             | <i>nodiflorum</i> | <i>latifolia</i> |           |
| <b>Phase 1</b> | 9.87             | 2.14    | 15.76 | 2.96    | 5.57  | 2.71    | 292.09             | 57.96 | 75.8                 | 75.8        | Growing           | Latent           |           |
| <b>Phase 2</b> | 11.61            | 3.37    | 18.09 | 4.84    | 5.92  | 2.84    | 128.56             | 33.43 | 298.39               | 298.39      | Growing           | Pruned           |           |
| <b>Phase 3</b> | 18.37            | 3.35    | 25.62 | 4.42    | 11.71 | 2.90    | 39.91              | 16.06 | 230.92               | 230.92      | Pruned            | Growing          |           |
| <b>Phase 4</b> | 22.14            | 3.15    | 29.36 | 3.48    | 15.66 | 3.18    | 54.46              | 25.54 | 536.95               | 536.95      | Growing           | Growing          |           |

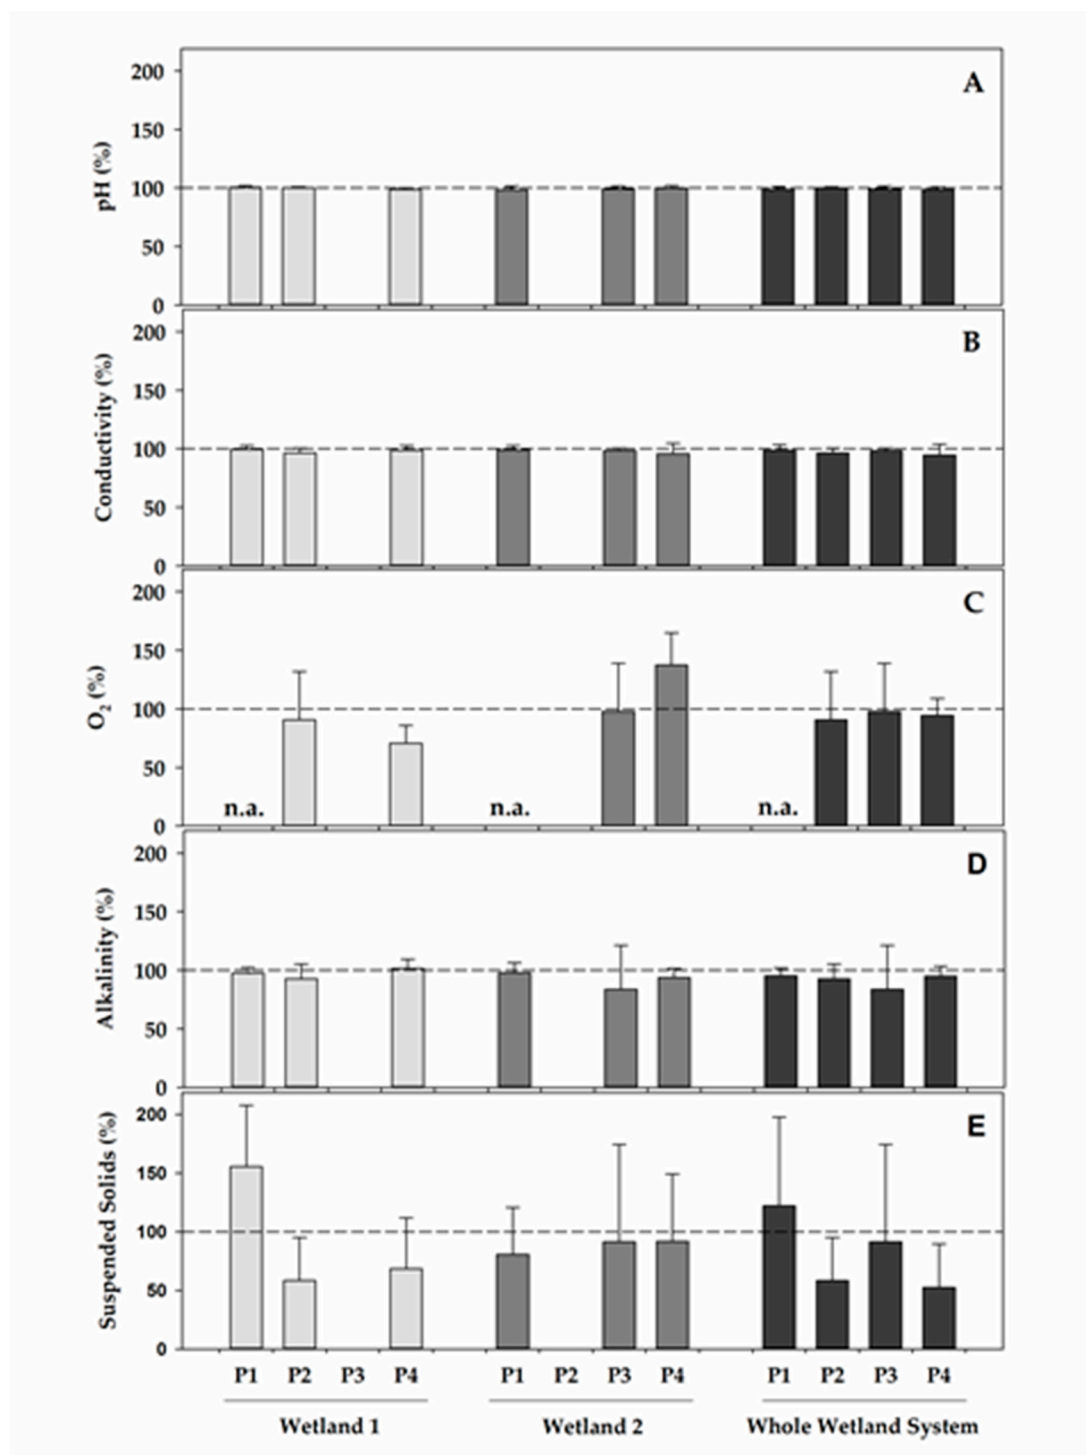

**Suppl. Figure S1.** Percent variations in different water features after passing Wetland 1 (left), Wetland 2 (centre) and overall constructed wetland (right), compared to each of their inlets at each of the operational phases (P). The yield in the removal of pollutants was calculated as a percentage comparing the value of each variable in the wetland inlet to that in the wetland outlet. (A) pH, (B) Electrical conductivity, (C) Dissolved oxygen, (D) Alkalinity, and (E) Suspended solids. Data represent the mean (bar) and the standard deviation (whisker). Dashed line represents 100 %, this is, equal concentration in the inlet as in the outlet. Wetland 1 was inoperative during Phase 3, whereas Wetland 2 was inoperative during Phase 2. n.a. = data not available

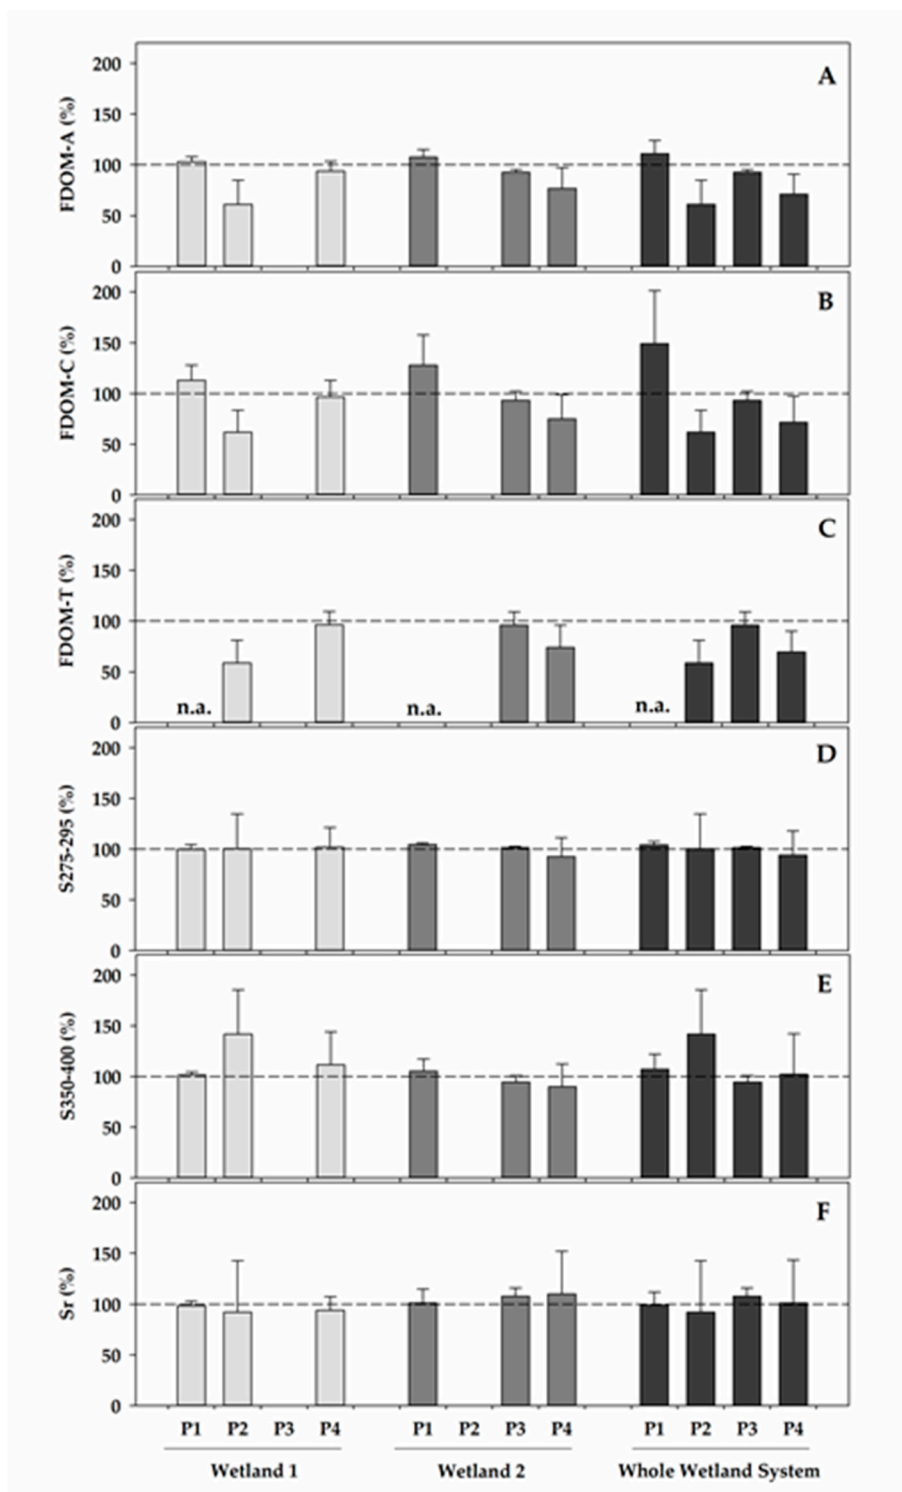

**Suppl. Figure S2.** Percent variations in different water features after passing Wetland 1 (left), Wetland 2 (center) and overall constructed wetland (right), compared to each of their inlets at each of the operational phases (P). The yield in the removal of pollutants was calculated as a percentage comparing the value of each variable in the wetland inlet to that in the wetland outlet. (A) FDOM-A (humic and fulvic acids), (B) FDOM-C (humic and fulvic acids), (C) FDOM-T (proteins), (D) CDOM of high molecular weight (S<sub>350-400</sub>), (E) CDOM of low molecular weight (S<sub>275-295</sub>), and (F) S<sub>r</sub> ratio (S<sub>275-295</sub>/S<sub>350-400</sub>). Data represent the mean (bar) and the standard deviation (whisker). Dashed line represents 100 %, this is, equal concentration in the inlet as in the outlet. Wetland 1 was inoperative during Phase 3, whereas Wetland 2 was inoperative during Phase 2. n.a. = data not available
